# Supplementary material for: Lateral Semicircular Canal Asymmetry in Idiopathic Scoliosis: An Early Link between Biomechanical, Hormonal and Neurosensory Theories?
Source: PLoS One. 2015 Jul 17;10(7):e0131120. doi: 10.1371/journal.pone.0131120 (PMC4506017; doi:10.1371/journal.pone.0131120)
Supplement: S1 Table — (XLSX) [file pone.0131120.s001.xlsx]

## Sheet: Feuil1
Participant	Scol	Age	IA	LDR	LDL	LDR-LDL	[LDR-LDL]	ADR	ADL	ADR-ADL	[ADR-ADL]	PDR	PDL	PDR-PDL	[PDR-PDL]	VLFR	VLFL	VLFR-VLFL	[VLFR-VLFL]	VLSR	VLSL	LocScol	ThoraRight	Side	Cobb	Risser	Calorique deficit	CalorPatho15	Caloric prepond	Comment
1	1	15	148	36	38	-2	2	43	41	2	2	36	41	-5	5	72	68	4	4	82	83	0	0	0	35	4	35	1	0	OUTLIER
2	1	15	177	40	41	-1	1	38	39	-1	1	37	39	-2	2	90	87	3	3	86	82	0	0	0	30	2	14	0	1
3	1	17	173	45	45	0	0	44	42	2	2	43	44	-1	1	89	84	5	5	76	86	0	0	0	25	4	7	0	0
4	1	14	167	41	43	-2	2	39	39	0	0	39	41	-2	2	84	83	1	1	69	64	0	0	3	25	2	16	1	1
5	1	14	177	42	45	-3	3	39	39	0	0	40	43	-3	3	92	85	7	7	80	82	1	4	1	15	0	5	0	0
6	1	18	179	43	44	-1	1	41	41	0	0	41	40	1	1	90	89	1	1	86.5	86	1	4	1	15	2	35	1	0
7	1	17	157	44	45	-1	1	39	40	-1	1	41	42	-1	1	76	81	-5	5	80	84						54	1	0
8	1	16	163	42	43	-1	1	39	40	-1	1	40	41	-1	1	84	79	5	5	75	74						13	0	1
9	1	11	169.5	45	44	1	1	43	41	2	2	43	41	2	2	92	77.5	14.5	14.5	80	81	3	4	3	20	0	999	999	999	Spontaneous Nystag
10	1	16	172	43	43	0	0	39	38	1	1	40	40	0	0	86	86	0	0	77.5	82	1	4	0	15	4	11	0	1
11	1	17	163	44	47	-3	3	40	41	-1	1	41	42	-1	1	83	80	3	3	70	68	0	0	0	35	5	20	1	0
12	1	18	163	42	42	0	0	39	37	2	2	39	38	1	1	76	87	-11	11	89.5	88.5	0	0	0	35	4	8	0	0
13	1	14	157	46	46	0	0	42	44	-2	2	42	43	-1	1	77	80	-3	3	80	81	0	0	3	30	2	56	1	0
14	1	16	165	41	44	-3	3	39	40	-1	1	38	41	-3	3	82	83	-1	1	86	86	0	0	0	25	3	21	1	0
15	1	15	166	44	42	2	2	38	39	-1	1	40	41	-1	1	79	87	-8	8	69	68	3	4	1	25	0	11	0	0
16	1	16	170	44	46	-2	2	41	43	-2	2	41	44	-3	3	88	82	6	6	82	82	1	4	1	40	4	6	0	1
17	1	16	177	43	45	-2	2	40	42	-2	2	41	42	-1	1	90	87	3	3	78.5	76	1	4	1	25	3	14	0	0
18	1	13	175	41	41	0	0	39	38	1	1	41	39	2	2	87	88	-1	1	68.5	75	0	0	0	40	4	1	0	0
19	0	19	171	42	43	-1	1	39	40	-1	1	38	40	-2	2	84	87	-3	3	77	76						22	1	1
20	0	19	177	43	42	1	1	40	38	2	2	41	40	1	1	90	87	3	3	79	82						8	0	1
21	0	18	172	45	43	2	2	40	39	1	1	41	40	1	1	86	86	0	0	84	80						12	0	0
22	0	17	173	43	43	0	0	41	39	2	2	42	40	2	2	85	88	-3	3	86	80						8	0	0
23	0	16	176	42	42	0	0	39	41	-2	2	40	40	0	0	85	91	-6	6	69	71						11	0	0
24	0	16	174	42	41	1	1	40	38	2	2	41	39	2	2	84	90	-6	6	77	76						10	0	0
25	0	14	176	41	42	-1	1	39	40	-1	1	38	40	-2	2	85	89	-4	4	78	77						0	0	0
26	0	19	179	43	42	1	1	40	39	1	1	41	41	0	0	90	89	1	1	69	68						8	0	0
27	0	16	178	42	42	0	0	40	39	1	1	39	39	0	0	87	91	-4	4	80	80						14	0	0
